# Supplementary material for: Forkhead Box F1 promotes breast cancer cell migration by upregulating lysyl oxidase and suppressing Smad2/3 signaling
Source: Springer Nature journal article supplement (doi:10.1186/s12885-016-2196-2), 2016-02-23
Supplement: MOESM2 [file 9746174]

Supplementary Table 1. Affymetrix microarray data of genes involved in EMT, regulated by NFI-C2 and FoxF1.

| Gene description                     | Gene symbol |        |       |
|--------------------------------------|-------------|--------|-------|
|                                      |             | NFI-C2 | FoxF1 |
| E-cadherin                           | CDH1        |        | -     |
| Desmoplakin                          | Dsp         |        | -     |
| Plakophilin 1                        | Pkp1        |        | -     |
| Desmoglein 1 $\beta$                 | Dsg1b       | +      | -     |
| Desmocollin 2                        | Dsc2        | +      | -     |
| Vimentin                             | Vim         | -      | +     |
| Fibronectin                          | Fn1         | -      | +     |
| N-cadherin                           | CDH2        | -      | +     |
| Twist-related protein 1              | Twist1      |        | +     |
| Twist-related protein 2              | Twist2      |        | +     |
| Zink finger E-box-binding homeobox 1 | Zeb1        |        | +     |
| Zink finger E-box-binding homeobox 2 | Zeb2        |        | +     |
| Snail 1                              | Snai1       | -      |       |

Affymetrix microarray was used to compare the transcriptome of HC11 wild type cells to that of cells overexpressing NFI-C2 or FoxF1. EMT marker genes regulated 1.5 fold up or down as a minimum are listed.
