# Supplementary material for: Forkhead Box F1 promotes breast cancer cell migration by upregulating lysyl oxidase and suppressing Smad2/3 signaling
Source: Springer Nature journal article supplement (doi:10.1186/s12885-016-2196-2), 2016-02-23

Supplementary Figure 2

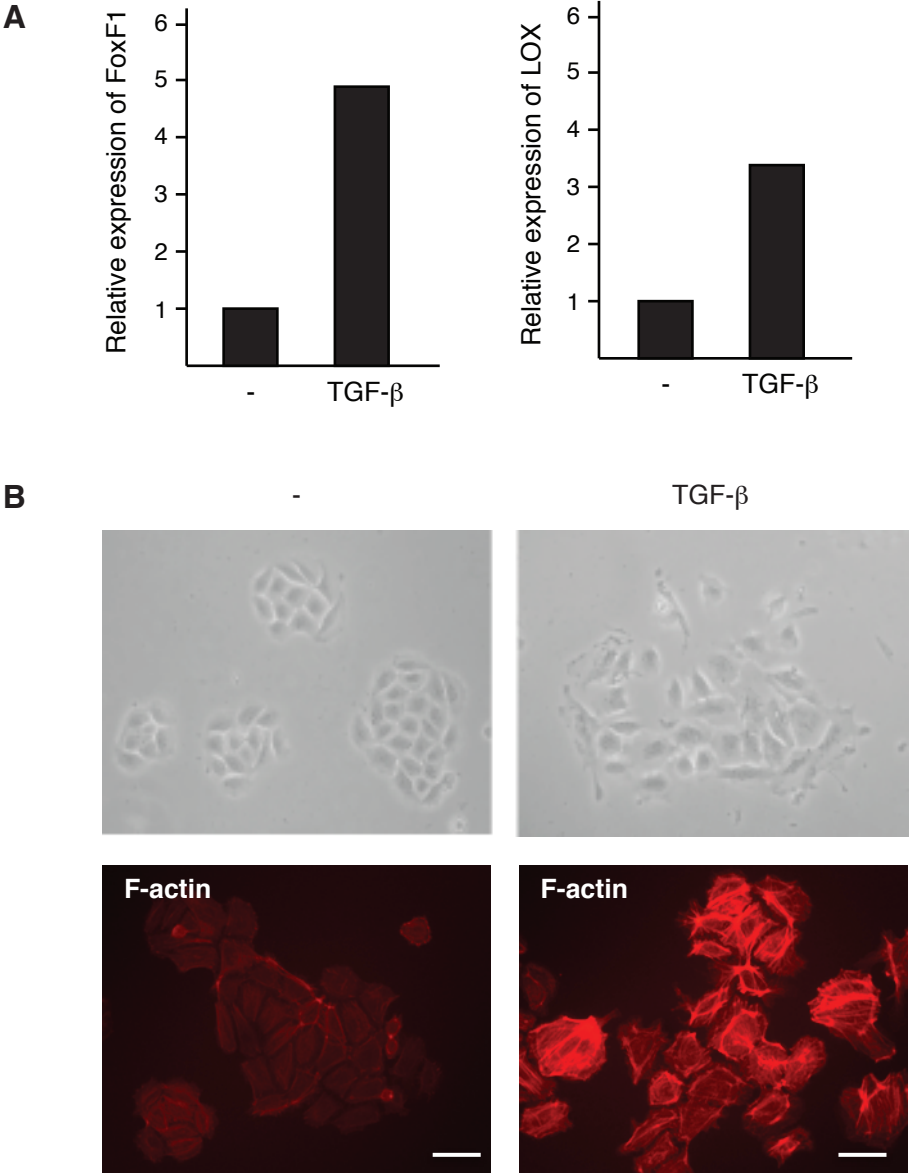

Supplement: MOESM4 [file 9746174]
